# Supplementary material
Source: PubMed Central journal article supplement (PMC7818645)
Supplement: ao0c05615_si_001.pdf [file ao0c05615_si_001.pdf]

# Kinetic Analysis of Methane - Propane Hydrate Formation by the use of Different Impellers

Sotirios Nik. Longinos\* and Mahmut Parlaktuna

Department of Petroleum and Natural Gas Engineering, Middle East Technical University, Ankara, Turkey

\*Corresponding author: Sotirios Nik. Longinos, [s.n.longinos@gmail.com](mailto:s.n.longinos@gmail.com)

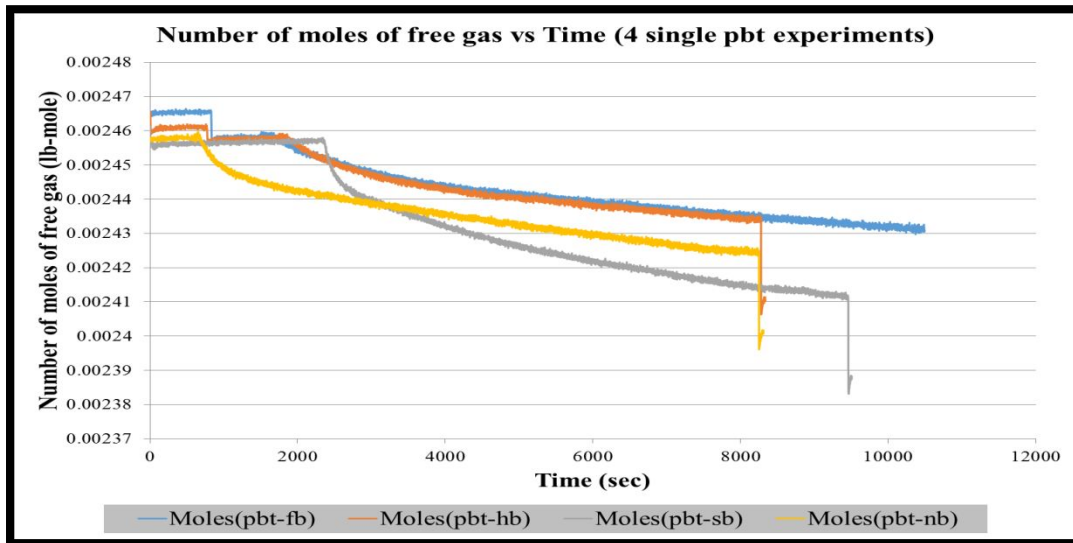

Figure S1 Number of moles of free gas vs time for four single pbt experiments until stabilization of hydrate formation with driving force 8.5

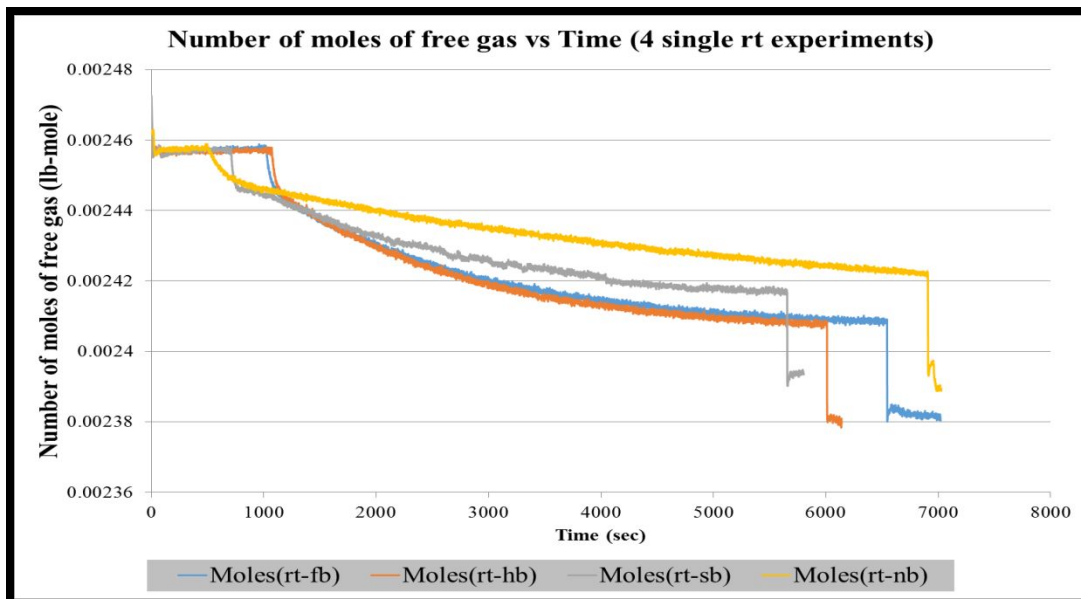

Figure S2 Number of moles of free gas vs time for four single rt experiments until stabilization of hydrate formation with driving force 8.5

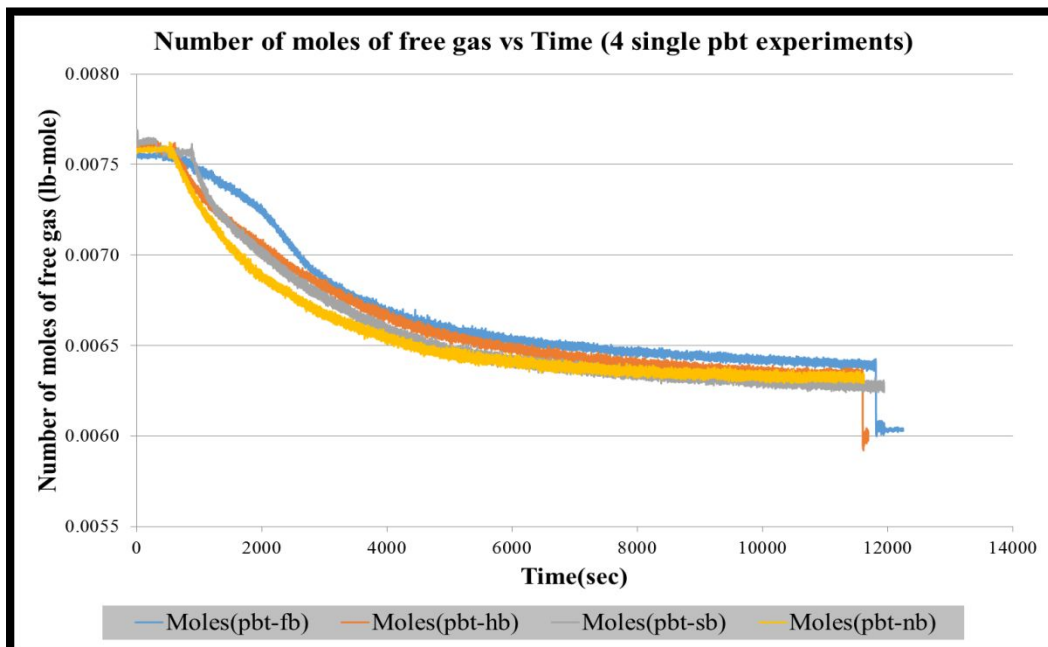

Figure S3 Number of moles of free gas vs time for four single pbt experiments until stabilization of hydrate formation with driving force 16

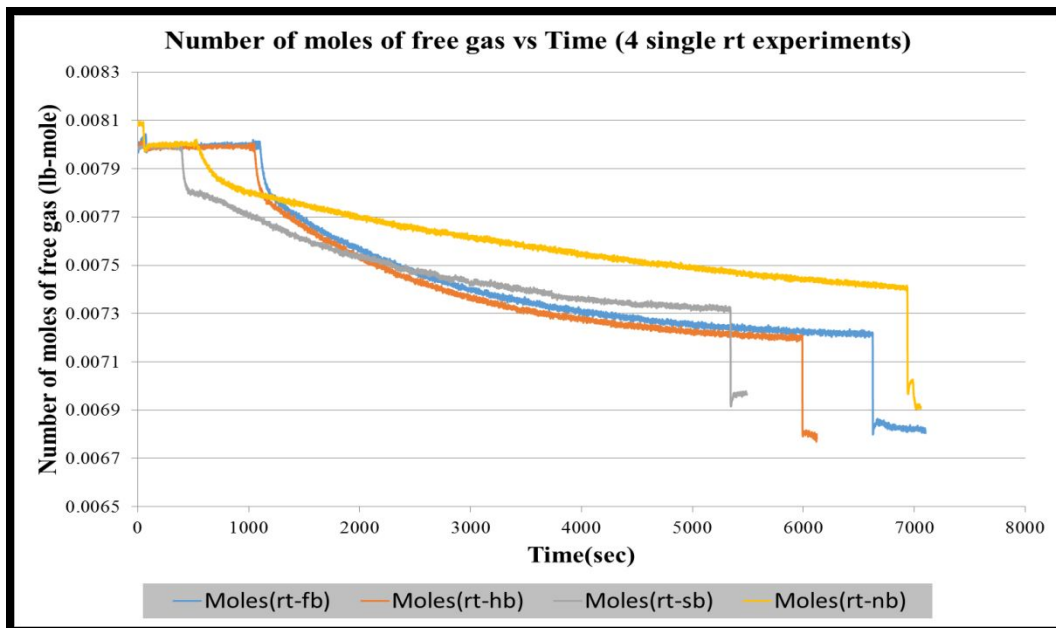

Figure S4 Number of moles of free gas vs time for four single rt experiments until stabilization of hydrate formation with driving force 16
